# Direct Sum Matrix Game with Prisoner's Dilemma and Snowdrift Game

Chengzhang Ma<sup>1,2</sup>, Wei Cao<sup>1,2</sup>, Wangheng Liu<sup>1</sup>, Rong Gui<sup>1,2</sup>, Ya Jia<sup>1\*</sup>

<sup>1</sup> Department of Physics and Institute of Biophysics, Huazhong Normal University, Wuhan, China, <sup>2</sup> Department of Applied Physics, College of Science, Huazhong Agricultural University, Wuhan, China

## Abstract

A direct sum form is proposed for constructing a composite game from two  $2 \times 2$  games, prisoner's dilemma and snowdrift game. This kind of direct sum form game is called a multiple roles game. The replicator dynamics of the multiple roles game with well-mixed populations is explored. The dynamical behaviors on square lattice are investigated by numerical simulation. It is found that the dynamical behaviors of population on square lattice depend on the mixing proportion of the two simple games. Mixing SD activities to pure PD population inhibits the proportion of cooperators in PD, and mixing PD activities to pure SD population stimulates the proportion of cooperators in SD. Besides spatial reciprocity, our results show that there are roles reciprocities between different types of individuals.

**Citation:** Ma C, Cao W, Liu W, Gui R, Jia Y (2013) Direct Sum Matrix Game with Prisoner's Dilemma and Snowdrift Game. PLoS ONE 8(12): e81855. doi:10.1371/journal.pone.0081855

**Editor:** Matjaž Perc, University of Maribor, Slovenia

**Received:** April 2, 2013; **Accepted:** October 17, 2013; **Published:** December 20, 2013

**Copyright:** © 2013 Ma et al. This is an open-access article distributed under the terms of the Creative Commons Attribution License, which permits unrestricted use, distribution, and reproduction in any medium, provided the original author and source are credited.

**Funding:** This work was supported by the National Natural Science Foundation of China under 11175068 (YJ). The funders had no role in study design, data collection and analysis, decision to publish, or preparation of the manuscript.

**Competing Interests:** The authors have declared that no competing interests exist.

\* E-mail: jia@phy.ccnu.edu.cn

## Introduction

As mathematical framework, evolutionary game theory has been used to model evolutions in social, economical and biological systems widely [1–3]. One of the fundamental problems in this theory is the evolution and maintenance of cooperation among selfish individuals [4–8]. Two prominent mathematical metaphors have attracted most attention in theoretical and experimental studies of cooperation, the prisoner's dilemma and the snowdrift games [9–11]. In both games, each player decides whether to cooperate or defect. In the prisoner's dilemma (PD), cooperation of the players results to the highest payoff which is equally shared among the two players, yet individual defectors will do better if the opponent decides to cooperate. Since the selfish players want to maximize their own income and they both decide to defect. None of them gets a profit and instead of equally sharing the payoff received by mutual cooperation, they end up almost empty-handed. The snowdrift (SD) game has different payoffs matrix compare with the PD. It is an interesting alternative for the study of cooperation, and individuals in such game can gain access to benefits for the pair at one individual cost. Cooperators have to bear the costs whereas defectors are not. Both games represent social dilemmas [12], in which defectors are prone to exploit cooperators, and have an evolutionary advantage over cooperators in populations. But cooperation is widespread in the real world and required for many levels of biological organization ranging from genes to groups of animals. Cooperation is also the decisive organizing principle of human societies. Therefore, the underlying mechanisms of cooperation are much needed and have been investigated extensively in different contexts, such as kin selection [13], direct reciprocity [4,9,14–16], indirect reciprocity [17–19], group selection [20–22] and network reciprocity [23,24], which

are summarized as five rules [25]. The network reciprocity could also be regarded as a generalization of spatial reciprocity.

To study the dynamical behaviors of a spatial game, the following points should be considered: the spatial structure on which the game runs, the interactive ways of individuals, the updating and mutation rules. The most common spatial structure is the square lattice [23], in which the cooperators can form clusters to protect themselves against the exploitation by defectors. Small-world networks, scale-free graphs and evolving networks may also serve as the spatial structures of a game [26]. By adopting coevolutionary rules, coevolutionary games can rearrange network structures [27]. For instance, Chen et al. [28] have proposed a coevolutionary rule in spatial public goods games. The interactive ways are determined by payoff functions, which are known as payoff matrices in matrix games, and the scope of opponents, such as Von Neumann and Moore neighborhood in square lattice, pairwise interaction, group interaction, etc. Strategy updating and mutation rules may also affect evolutionary dynamics. Some examples include the birth-death and imitation rule [29], the proportional imitation rule [30], the reinforcement learning adoption rule [31], or the Fermi rule [32]. Wang et al. [33] have recently considered an adaptive strategy-adoption rule in which the focal player evaluates its strategy by comparing the average payoff of each strategy in the neighborhood. They have shown that the survivability of cooperators has a significant increment in contrast with that of pairwise strategy updating. Based on win-stay-lose-shift rule, Liu et al. [34] introduced a win-stay-lose-learn strategy updating rule in spatial prisoner's dilemma game, where the focal player attempts to update her strategy only when her payoff is less than her aspiration.

Most previous works about PD and SD game have been referred to the consideration of the individual interaction being

one fold, which means that all interactions adopt either PD or SD payoff matrix [32–35]. That is all individuals participate in the same kind of game. However, the situation that individuals involved in multiple activities is happened frequently in economic and social activities or biological behaviors. In the context of game theory, individuals participate in multiple games and act different roles in these games. Such games can be called *multiple roles game*(MRG).

In the present work, a simple MRG model with PD and SG payoff matrix is constructed. In the modeling approach section, we describe the model for multiple roles games with prisoner's dilemma and snowdrift game. In the results section, the replicator dynamics of the multiple roles game with will-mixed populations is explored, and the dynamical behaviors on square lattice are calculated in a numerical way over the parameter space. In the last section, conclusions are presented and the potential clues to other general cases are predicated.

## Modeling Approach

To elaborate the idea of MRG, let's focus on two-strategy games. The two strategies can be denoted as cooperation and defection, abbreviated as  $C$  and  $D$ , respectively. The payoff matrix has the form

$$\begin{array}{c|c} & C & D \\ \hline C & R & S \\ D & T & P \end{array} \quad (1)$$

Here, a player with  $C$  strategy obtains profit  $R$  from another  $C$  player,  $S$  from a  $D$  player. Similarly, a  $D$  player obtains  $T$  from a  $C$  player,  $P$  from another  $D$  player. The Prisoner's dilemma(PD) game starts on the condition as following:

$$T > R > P > S. \quad (2)$$

The relationship  $R > P$  implies that mutual cooperation is superior to mutual defection, while the relationships  $T > R$  and  $P > S$  imply that defection is the dominant strategy regardless of opponent's strategy. The SD game has a different condition as shown below:

$$T > R > S > P. \quad (3)$$

In contrast to PD, the best strategy now depends on the opponent's strategy. The relationship  $T > R$  implies that cooperation is better if the opponent defects, while  $S > P$  implies that defection is better if the opponent cooperates.

The general payoff matrix form(1) has too many parameters to be analyzed. To prevent this kind of situation, the payoff matrix form with two parameters is given for two-strategy game as following [36,37],

$$\begin{array}{c|c} & C & D \\ \hline C & 1 & S \\ D & T & 0 \end{array} \quad (4)$$

with  $-1 < S < 1$  and  $0 < T < 2$ . If  $T > 1 > 0 > S$ , (4) indicates PD payoff matrix, and if  $T > 1 > S > 0$ , it indicates SD payoff matrix. If a MRG model with PD and SD is constructed with the payoff matrix (4), it would have four parameters which will lead to complexity of analysis. Therefore, it is necessary to construct single

parameter payoff matrices of PD and SD. One can rescale the payoff matrix (4) to single parameter forms [10,11,35,38] as shown in Eq.(5)

$$M_{PD} = \begin{pmatrix} 1 & 0 \\ 1+u & u \end{pmatrix} \quad (5)$$

for the PD game, and

$$M_{SD} = \begin{pmatrix} 1 & 1-v \\ 1+v & 0 \end{pmatrix} \quad (6)$$

for the SD game. Both  $u$  and  $v$  are constrained to the interval  $[0,1]$ . Obviously, (5) and (6) satisfy the corresponding inequalities (2) and (3) respectively.

Now consider a population where each individual has two identities: prisoner for PD game and driver for SD game. Each individual participates in two games simultaneously. When two individuals interplay, the process is divided into two steps. In the first step, they have to determine what kind of game they will play, and in the second step, they play the selected game according to their own strategy. Let us assume that in a pairwise interplay they choose PD game with probability  $p$ , SD game with probability  $1-p$ . In this way, a simply MRG model is constructed(Fig. 1). The left panel of Fig. 1 shows that there are two channels of interaction between the individual A and B, the PD channel with probability  $p$  and the SD channel with probability  $1-p$ . The right panel of Fig. 1 shows the details of the payoff matrix of MRG. Here we denote strategies with capital letters  $C$  and  $D$  in PD game, and lowercase letters  $c$  and  $d$  in SD game. Formally, an extended payoff matrix  $M_{Ex}$  can be obtained by direct sum for the MRG,

$$M_{Ex} \equiv M_{PD} \oplus M_{SD} = \begin{pmatrix} M_{PD} & \mathbf{0} \\ \mathbf{0} & M_{SD} \end{pmatrix} \quad (7)$$

Since it is impossible that an individual who opts for PD game interacts with the individual who has made a choice of SD game with  $c$  or  $d$  strategy, we express these cases with two sub-matrices  $\mathbf{0}$  in (7).

To construct a spatial model of MRG, let's place each individual on one cell in a two-dimensional  $L \times L$  square lattice with periodic boundary conditions being used. There are no empty cells on lattice. An individual interacts with its Moore neighborhoods, and its total payoff is the sum of payoffs obtained from its all neighbors. The population is asynchronously updated by the rule known as the *replicator rule* or *proportional imitation rule* [30,36,39]. Randomly selecting a focal individual  $i$ , let  $\pi_i$  denotes its total payoff,  $s_i$  its category, or its strategy set. Individual  $i$  updates its strategy set by comparing its total payoff  $\pi_i$  to the total payoff  $\pi_j$  of a randomly selected neighbor  $j$ . The focal individual  $i$  adopts  $j$ 's strategy set  $s_j$  with a probability  $P_{ij}$  proportional to the payoff difference, provided that  $\pi_i < \pi_j$ . So the probability  $P_{ij}$  is given by

$$P_{ij} \equiv P(s_j \rightarrow s_i) = \begin{cases} (\pi_j - \pi_i)/\Phi, & \pi_i < \pi_j, \\ 0, & \pi_i \geq \pi_j, \end{cases} \quad (8)$$

where  $\Phi$  denotes a normalization constant to ensure  $P_{ij} \in [0,1]$ . Here

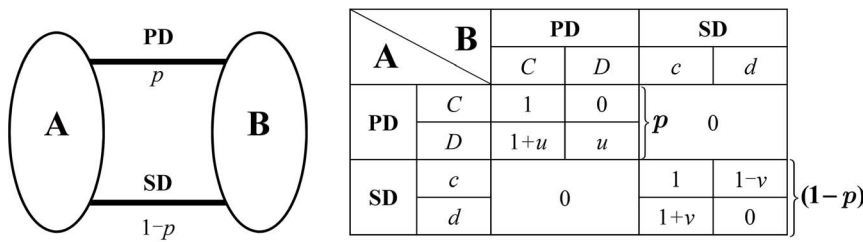

**Figure 1. Multiple roles game (MRG) model with PD and SD.** There are two interaction channels between individual A and B. The channel PD has a probability  $p$  to be selected and the channel SD has a probability  $1-p$  to be selected.  
doi:10.1371/journal.pone.0081855.g001

$$\Phi = \begin{cases} k(1+v), & p=0 \\ k[1+\max(u,v)], & 0 < p < 1, \\ k(1+u), & p=1, \end{cases} \quad (9)$$

where  $k=8$  represents the number of  $i$ 's Moore neighbors. After updating its strategy set, the payoff of the focal individual  $i$  with that of its all neighbors are reset to zero. Note that the current MRG model does not take into account mutations in updating strategy sets, and individuals propagate every strategy of its each role to the next generation perfectly.

## Results

### Replicator dynamics of the multiple roles game

According to the strategies individuals adopt, they can be divided into four categories, which can be recorded as  $Cc$ ,  $Cd$ ,  $Dc$ ,  $Dd$ . With this convention,  $Cd$  means that the individual adopts strategy of cooperation in PD games, and defection in SD games, and the other three categories are similar to  $Cd$ . In the replicator dynamics,  $x_1, x_2, x_3, x_4$  represent the fractions of  $Cc, Cd, Dc, Dd$  respectively. Without arising confusions, sometimes  $Cc, Cd, Dc, Dd$  also represent the fractions of the corresponding types of the individuals. The payoff matrix for the four strategies is:

$$A = \begin{pmatrix} 1 & p+(1-p)(1-v) & 1-p & (1-p)(1-v) \\ p+(1-p)(1+v) & p & (1-p)(1+v) & 0 \\ p(1+u)+(1-p) & p(1+u)+(1-p)(1-v) & pu+(1-p) & pu+(1-p)(1-v) \\ p(1+u)+(1-p)(1+v) & p(1+u) & pu+(1-p)(1+v) & pu \end{pmatrix} \quad (10)$$

The deterministic evolutionary game dynamics are given by the replicator equation [40,41]  $\dot{x}_i = x_i((\mathbf{A}\mathbf{x})_i - x^T \mathbf{A}\mathbf{x})$ . Here  $\mathbf{x} = (x_1, x_2, x_3, x_4)^T$ , and  $\sum x_i = 1$ . Let  $\dot{x}_i = 0$ , it is not difficult to get eight equilibrium points:  $(1,0,0,0)$ ,  $(0,1,0,0)$ ,  $(0,0,1,0)$ ,

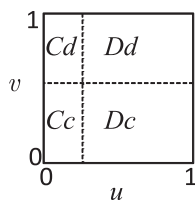

**Figure 2. Schematic presentation of  $u-v$  parameter plane.** Simulation runs with the parameters as  $u[0,1]$  step 0.05,  $v[0,1]$  step 0.05.  
doi:10.1371/journal.pone.0081855.g002

$(0,0,0,1)$ ,  $(1-v,v,0,0)$ ,  $(0,0,1-v,v)$ ,  $(1-\frac{p}{1-p}u-v,0,0,\frac{p}{1-p}u+v)$ ,  $(0,v-\frac{p}{1-p}u,1-v+\frac{p}{1-p}u,0)$ . Apparently, only the last two are related to the parameter  $p$ . Consideration of the constraint  $0 \leq x_i \leq 1$ , the seventh and eighth are only valid as they meet criterion  $0 \leq pu+(1-p)v \leq 1-p$  and  $0 \leq (1-p)v-pu \leq 1-p$ , respectively. It shows that the mixed probability  $p$  of PD and SD can influence the number of the equilibrium points.

### Effect of the mixed probability $p$ on population structure

Simulation runs on a  $51 \times 51$  lattice with four categories individuals initial randomly uniform distributing over it equiprobably. To ensure a correct convergence, 11000 time steps are employed [36], where one time step means each individual updates its strategies one time averagely. Preliminary simulation results shows that, for  $p$  from 0 to 1 step 0.05, the two-dimensional  $u-v$  parameter plane can be divided into four areas roughly as shown in Fig. 2. As expected, individuals tend to cooperate for smaller  $u$  or  $v$  values in both games, to defect for larger  $u$  or  $v$  values. As a result,  $Cc$  individuals locate mainly in left bottom region on  $u-v$  plane,  $Cd$  in left up region,  $Dc$  in right bottom region, and  $Dd$  in right up region. For more details, we set the parameter  $u$  at the interval  $[0,0.2]$  with step 0.01,  $v$  at  $[0,1]$  with step 0.05, and for  $p$  from 0 to 1 step 0.05. For each  $p$ , we introduce average fractions of  $Cc, Cd, Dc, Dd$  over the region  $u \in [0,0.2]$  and  $v \in [0,1]$  in the  $u-v$  phase plane. These global indexes fall in the range  $[0,1]$ . Fig. 3 shows the simulation results of the influence of  $p$  on the average fractions of the four categories of individuals. The left endpoints of the curves correspond to the case  $p=0$ , which

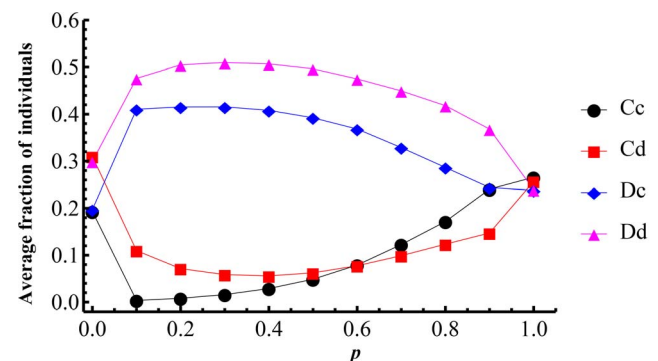

**Figure 3. The average fractions over  $u-v$  parameter plane of  $Cc, Cd, Dc, Dd$  in dependence on  $p$ .** For each  $p$ , the simulations run on  $51 \times 51$  square lattice with  $(u,v)$  in discrete  $u-v$  parameter plane. The initial average fractions of the four types are all 0.25.  
doi:10.1371/journal.pone.0081855.g003

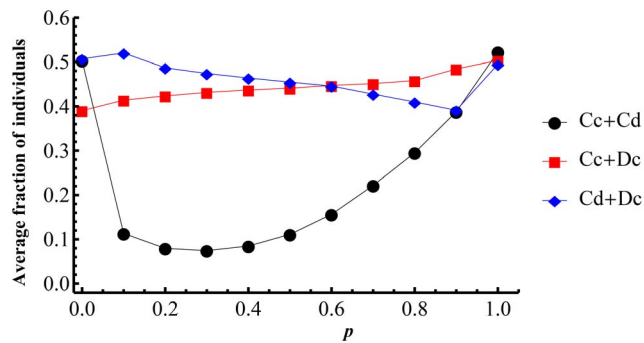

**Figure 4. The average fractions of  $Cc+Cd$  as PD  $C$ ,  $Cc+Dc$  as SD  $c$ , and  $Cd+Dc$  in dependence on  $p$ .** For each  $p$ , the simulations run on  $51 \times 51$  square lattice with  $(u,v)$  in discrete  $u-v$  parameter plane. The initial average fractions of the four types are all 0.25. doi:10.1371/journal.pone.0081855.g004

indicate the population structure with pure SD game. The right endpoints of the curves correspond to the case  $p=1$ , which indicate the population structure with pure PD game. Comparing with these reference endpoints the average fractions of  $Dc$  and  $Dd$  form two convex curves, and the average fractions of  $Cc$  and  $Cd$  form two concave curves. It is quite obvious that from the global perspective, mixing SD and PD games will stimulate  $Dc$  and  $Dd$ , and inhibit  $Cc$  and  $Cd$  individuals.

For comparison with the pure PD and SD games, let  $PDC$  represents the average fraction of players with  $C$  strategy in PD games, which equals to  $Cc+Cd$ , and  $SDc$  represents the average fraction of players with  $c$  strategy in SD games, which equals to  $Cc+Dc$ . The average fractions of  $PDC$  and  $SDc$  are given in Fig. 4 as functions of  $p$ . The  $SDc$  curve increases with the increasing mixed probability  $p$ , which indicates cooperators of SD increase as  $p$  increases. It means that mixing PD game in SD population can stimulate cooperate fraction in SD. The average fraction of  $PDC$  forms a concave curve and stills bottoming out in the area  $p=0.2$  to  $0.4$ . From the view of PD, mixing SD game in PD population tends to inhibit the cooperate  $C$  strategy in PD game. The extent of inhibition reaches a maximum at  $p=0.2$  to  $0.4$ . The population fractions distributing in the phase plane can reveal more details of the evolutionary dynamics. Fig. 5 shows the fraction of  $SDc$  distributing in  $u-v$  parameter plane. As a frame of reference, Fig. 5A( $p=0.0$ ) represents the case of pure SD population, in which the  $SDc$  individuals are mainly distributed in the low value zone of  $v$ , or the bottom of  $u-v$  plane, and have no association with the parameter  $u$ . Fig. 5B,C,D( $p=0.3, 0.6, 0.9$  respectively) show that with the increase of  $p$ , the  $SDc$  region expands slowly to the zone of the larger  $v$  value. This is in consistency with the  $SDc$  curve in Fig. 4. Fig. 6 shows the fraction of  $PDC$  distributing in  $u-v$  plane. As a frame of reference, Fig. 6A( $p=1.0$ ) represents the case of pure PD population, in which the  $PDC$  individuals are mainly distributed in the low value zone of  $u$ , or the left of  $u-v$  plane, and have no

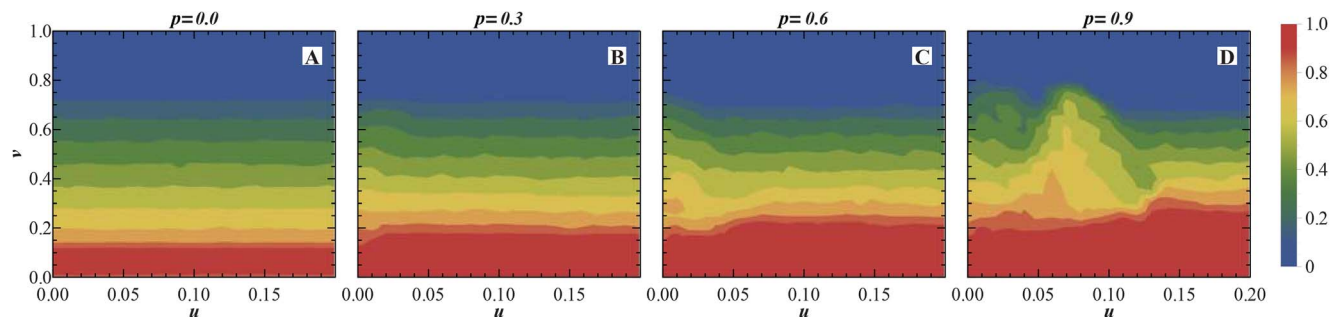

**Figure 5. The fractions of  $SDc = Cc + Dc$  individuals in  $u-v$  parameter plane with  $p=0.0$  (pure SD population),  $0.3, 0.6, 0.9$ .** The initial average fractions of  $Cc, Cd, Dc, Dd$  are all 0.25 and the individuals are randomly distributed on lattices evenly in the beginning. doi:10.1371/journal.pone.0081855.g005

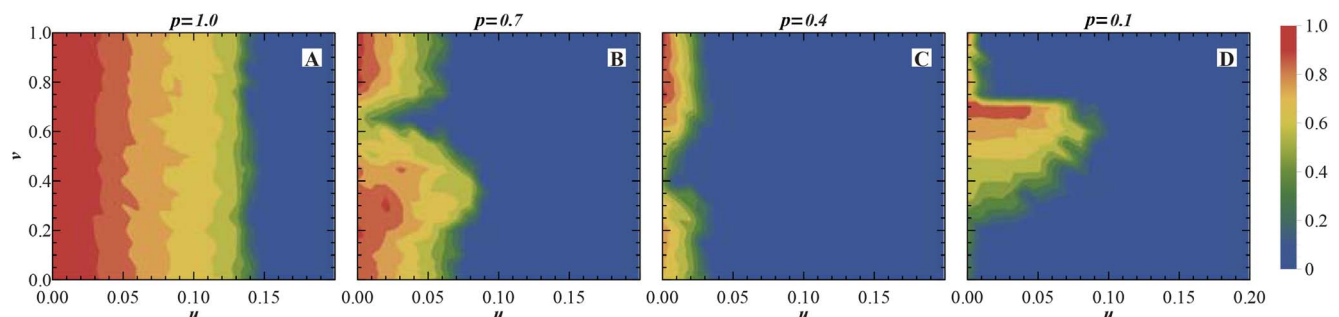

**Figure 6. The fractions of  $PDC = Cc + Cd$  individuals in  $u-v$  parameter plane with  $p=1.0$  (pure PD population),  $0.7, 0.4, 0.1$ .** The initial fractions of  $Cc, Cd, Dc, Dd$  are all 0.25 and the individuals are randomly distributed on lattices evenly in the beginning. doi:10.1371/journal.pone.0081855.g006

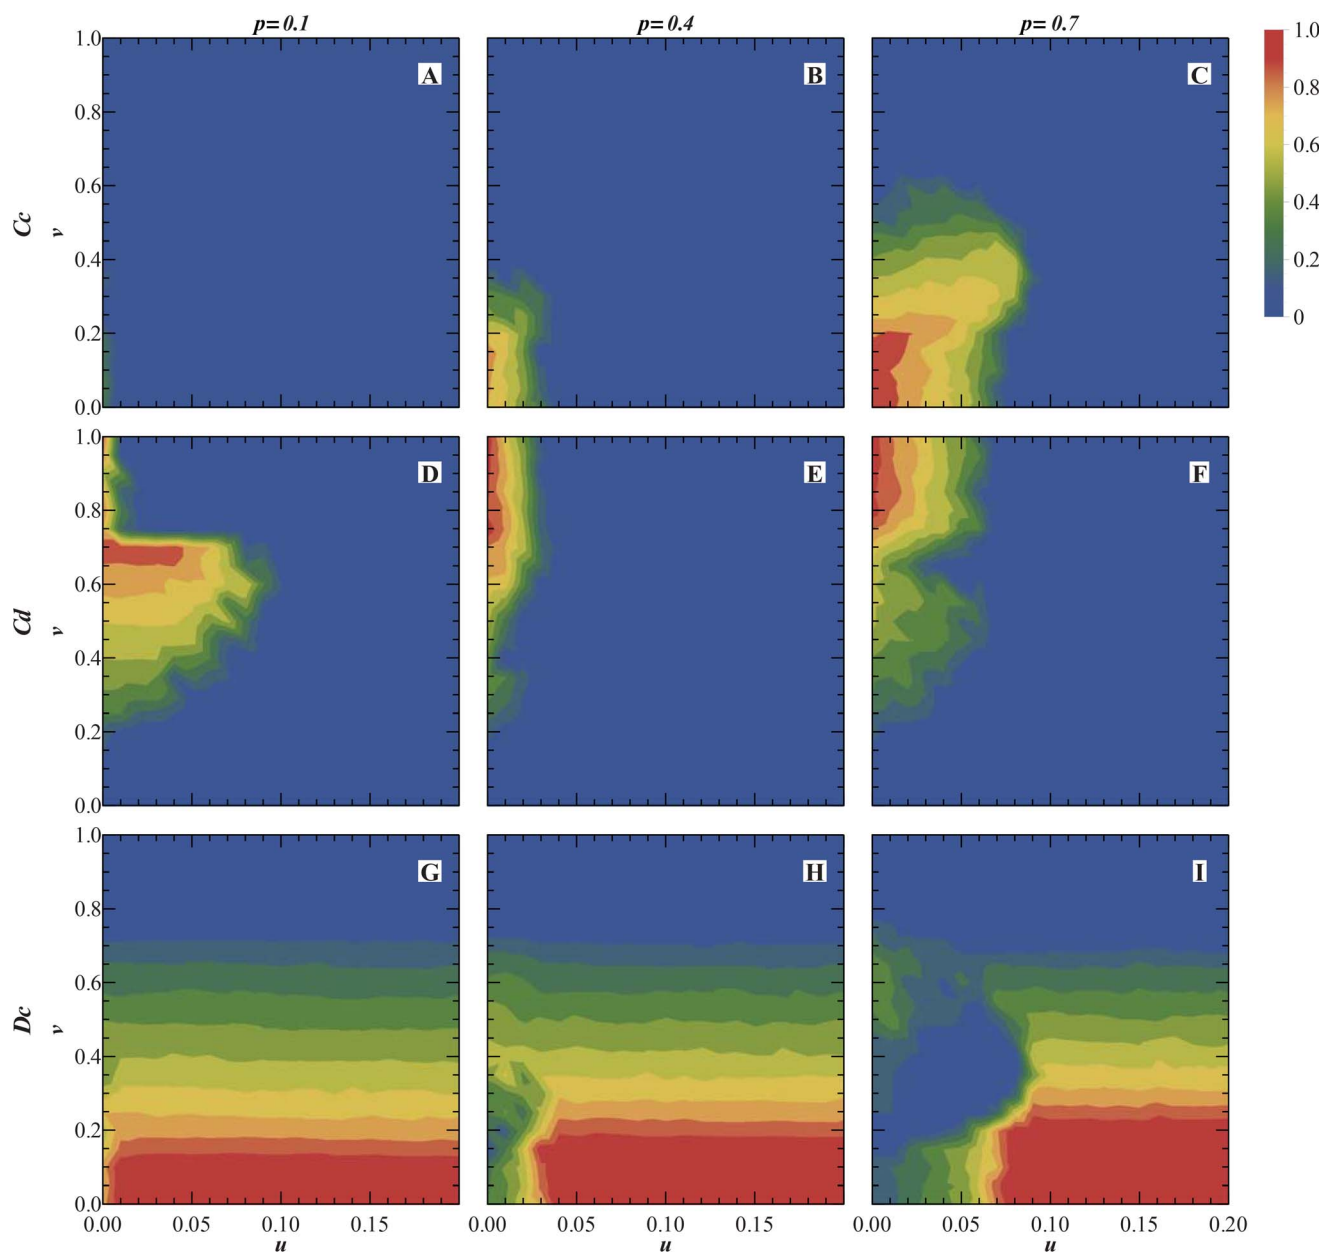

**Figure 7. The fractions of  $C_c$  (the first row),  $C_d$  (the second row) and  $D_c$  (the third row) individuals in  $u-v$  parameter plane.** For the first column  $p=0.1$ ; the second column  $p=0.4$ ; the third column  $p=0.7$ .  
doi:10.1371/journal.pone.0081855.g007

association with the parameter  $v$ . Fig. 6B,C( $p=0.7, 0.4$  respectively) show that with the decrease of  $p$ , the  $PDC$  region compresses to the zone of the smaller  $u$  value inhomogeneously. But one should note that for  $p=0.1$ (Fig. 6 D), the  $PDC$  region has an anomalous expansion comparing with that of  $p=0.4$ (Fig. 6 C). This kind of anomalous expansion is consistent with the curve  $PDC$  in Fig. 4 which decreases first and then increases with  $p$  from 1.0 to 0. To explore the origin of the  $PDC$  anomalous expansion at lower  $p$  values, it should be noted that  $PDC = C_c + C_d$ . The fractions of  $C_c$  and  $C_d$  in  $u-v$  parameter plane are shown in Fig. 7 A–F for several different  $p$  values. From Fig. 7 A,D we know

that the anomalous expansion of  $PDC$  for  $p=0.1$  is originated from that of  $C_d$ .

It is well known that if there is only one kind of game in population, such as PD or SD game, there exists effect of spatial reciprocity in lattice space [23,24]. But if an individual in lattice space is drawn into multiple games, its different strategies in each game may lead up to the situation: what one loses on the swings, she gets back on the roundabouts. In the current situation, it becomes that what one loses as a prisoner in PD, she gets back as a driver in SD, or vice versa. This phenomenon can be called as *roles reciprocity*. This effect superimposes on that of spatial reciprocity to

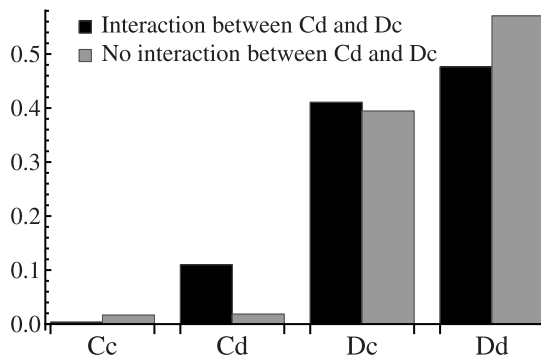

**Figure 8. Illustration of the effect of roles reciprocity of *Cd* and *Dc* with  $p=0.1$ .** Without the interaction between *Cd* and *Dc*, their average fractions descend obviously. doi:10.1371/journal.pone.0081855.g008

influence the fractions of individuals on payoff matrix parameter space  $u-v$  plane.

In the PD and SD MRG case, from comparing the fractions of *Cd* and *Dc* (Fig. 7 D–F, G–I) in  $u-v$  parameter plane, it is found that the regions of *Cd* and *Dc* extend to the side of each other. This phenomenon is a typical demonstration of *roles reciprocity*. Roles reciprocity strengthens the survival ability of *Cd* and *Dc* players. Although individuals with strategies *Cd* or *Dc* have no maximal fractions in four categories (Fig. 3), they have more tolerance in unfavorable parameters (Fig. 4  $Cd+Dc$  curve) in appropriate parameter intervals of  $p$ ,  $u$  and  $v$ .

To illustrate the effect of roles reciprocity, we cancel the interaction between the *Cd* and *Dc* individuals for simulation with  $p=0.1$ . Comparing with roles reciprocity (the case of existing interaction between the *Cd* and *Dc*), the average fractions of *Cd* and *Dc* descend in the absence of interaction between them (Fig. 8). In  $u-v$  parameter plane, the effect of roles reciprocity become ever more evident (Fig. 9). Without the roles reciprocity, the cross domain of *Cd* and *Dc* vanished completely (Fig. 9 B). It can be say

that *Cd* and *Dc* individuals establish a ecological chain in a small parameter region with about  $u \in [0, 0.06]$  and  $v \in [0.3, 0.7]$  at  $p=0.1$ . The fact that the region is too small reflects the frangibility of that toy ecosystem.

## Discussion

In the real world, it is common that an agent acts as multiple identities. It can be say that the agents participate in multiple games and have multiple roles, and it can be called multiple roles game, or MRG. To imitate these cases, a evolutionary game model is introduced, in which each agent has two identities, one for PD game and another for SD game. A parameter  $p$  is introduced to indicate the probability to select PD game for each pair interaction. It shows that the mixed probability  $p$  of PD and SD can influence the number of the equilibrium points in the deterministic evolutionary game dynamics. In the spatial MRG, the agents are placed on patches in a two-dimensional lattice with periodic boundary conditions being used. The number simulation shows that mixing SD and PD games will stimulate *Dc* and *Dd*, and inhibit *Cc* and *Cd* individuals from the global perspective. Comparison with the pure PD or SD games shows that SD cooperators ratio ( $SDc = Cc + Dc$ ) increases as  $p$  increase, and PD cooperators ratio ( $PDC = Cc + Cd$ ) is inhibited for  $p \in (0, 1)$ .

The population fraction distributions in the  $u-v$  phase plane reveals that besides spatial reciprocity, there exist roles reciprocity, which means for some kind of agents their multiple identities will have help them to obtain benefits in population. In the MRG model with PD and SD games, because of the roles reciprocity, *Cd* and *Dc* individuals form a ecological chain in appropriate parameter region. These toy ecosystems are fragile on account of too small of the appropriate parameter areas.

To configure our multiple roles game model, we introduced direct sum form to construct the payoff matrix from simple game's payoff matrix. This method gives a way to construct complex MRG model from simple sub games. In game theory experiments, participators often influence by various factors. Or in biology, a group may have more than one function. If one need to construct a game theory frame in these cases, the MRG modeling method could be an option to consider.

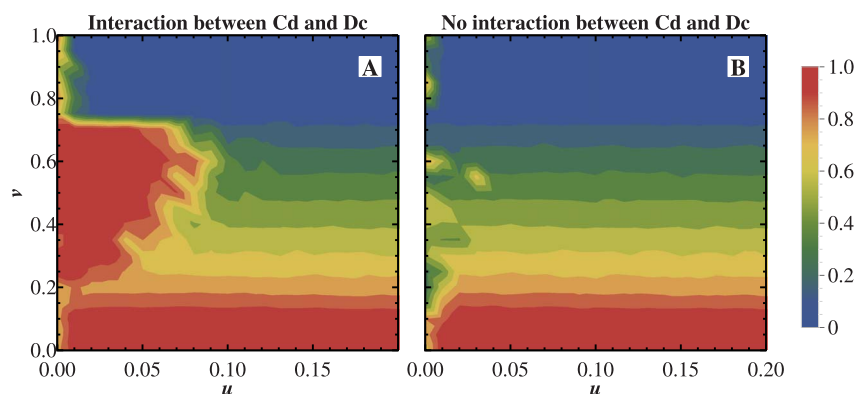

**Figure 9. Illustration of the effect of roles reciprocity of *Cd* and *Dc* with  $p=0.1$  in  $u-v$  parameter plane.** A) The fraction of  $Cd+Dc$  with the interaction between *Cd* and *Dc*. The cross domain of *Cd* and *Dc* obviously exists. B) The fraction of  $Cd+Dc$  without the interaction between *Cd* and *Dc*. The cross domain of *Cd* and *Dc* vanishes completely. doi:10.1371/journal.pone.0081855.g009

## Acknowledgments

We thank Lijian Yang, Jun Ma and Jun Tang for inspiring discussions and helpful comments on earlier versions of the manuscript.

## References

- Smith J (1982) *Evolution and the Theory of Games*. Cambridge University Press, Cambridge, UK.
- Colman A (1995) *Game theory and its applications in the social and biological sciences*. Butterworth-Heinemann, Oxford, UK.
- Nowak M (2006) *Evolutionary dynamics: exploring the equations of life*. Harvard University Press, Cambridge, MA, USA.
- Trivers R (1971) The evolution of reciprocal altruism. *Q Rev Biol* 46: 35–57.
- Lotem A, Fishman M, Stone L (1999) Evolution of cooperation between individuals. *Nature* 400: 226–227.
- Boyd R, Gintis H, Bowles S, Richerson P (2003) The evolution of altruistic punishment. *Proc Nat Acad Sci USA* 100: 3531–3535.
- Wang J, Fu F, Wu T, Wang L (2009) Emergence of social cooperation in threshold public goods games with collective risk. *Phys Rev E* 80: 016101.
- Szolnoki A, Perc M (2012) Conditional strategies and the evolution of cooperation in spatial public goods games. *Phys Rev E* 85: 026104.
- Axelrod R, Hamilton W (1981) The evolution of cooperation. *Science* 211: 1390–1396.
- Hauert C, Doebeli M (2004) Spatial structure often inhibits the evolution of cooperation in the snowdrift game. *Nature* 428: 643–646.
- Doebeli M, Hauert C (2005) Models of cooperation based on the prisoner's dilemma and the snowdrift game. *Ecol Lett* 8: 748–766.
- Kerr NL (1983) Motivation losses in small groups: A social dilemma analysis. *J Pers Soc Psychol* 45: 819–828.
- Hamilton WD (1964) The genetical evolution of social behaviour I. *J Theor Biol* 7: 1–16.
- Axelrod R (1984) *Evolution and the Theory of Games*. New York: Basic Books.
- Nowak MA, Sigmund K (1992) Tit for tat in heterogeneous populations. *Nature* 355: 250–253.
- Nowak M, Sigmund K (1993) A strategy of win-stay, lose-shift that outperforms tit-for-tat in the prisoner's dilemma game. *Nature* 364: 56–58.
- Nowak MA, Sigmund K (1998) Evolution of indirect reciprocity by image scoring. *Nature* 393: 573–577.
- Nowak MA, Sigmund K (2005) Evolution of indirect reciprocity. *Nature* 437: 1291–1298.
- Ohtsuki H, Iwasa Y (2006) The leading eight: social norms that can maintain cooperation by indirect reciprocity. *J Theor Biol* 239: 435–444.
- Wilson DS (1975) A theory of group selection. *Proc Nat Acad Sci USA* 72: 143–146.
- Wilson DS (1983) The group selection controversy: history and current status. *Annu Rev Ecol Syst* 14: 159–187.
- Traulsen A, Nowak MA (2006) Evolution of cooperation by multilevel selection. *Proc Nat Acad Sci USA* 103: 10952–10955.
- Nowak M, May R (1992) Evolutionary games and spatial chaos. *Nature* 359: 826–829.
- Ohtsuki H, Hauert C, Lieberman E, Nowak M (2006) A simple rule for the evolution of cooperation on graphs and social networks. *Nature* 441: 502–505.
- Nowak M (2006) Five rules for the evolution of cooperation. *Science* 314: 1560–1563.
- Szabó G, Fáth G (2007) Evolutionary games on graphs. *Physics Reports* 446: 97–216.
- Perc M, Szolnoki A (2010) Coevolutionary games—a mini review. *BioSystems* 99: 109–125.
- Chen X, Liu Y, Zhou Y, Wang L, Perc M (2012) Adaptive and bounded investment returns promote cooperation in spatial public goods games. *PloS one* 7: e36895.
- Ohtsuki H, Nowak MA (2006) Evolutionary games on cycles. *Proc R Soc Lond B* 273: 2249–2256.
- Schlag K (1998) Why imitate, and if so, how?: A boundedly rational approach to multi-armed bandits. *J Econ Theory* 78: 130–156.
- Wang S, Szalay MS, Zhang C, Csermely P (2008) Learning and innovative elements of strategy adoption rules expand cooperative network topologies. *PLoS One* 3: e1917.
- Szabó G, Töke C (1998) Evolutionary prisoners dilemma game on a square lattice. *Phys Rev E* 58: 69–73.
- Wang X, Perc M, Liu Y, Chen X, Wang L (2012) Beyond pairwise strategy updating in the prisoner's dilemma game. *Sci Rep* 2: 740–740.
- Liu Y, Chen X, Zhang L, Wang L, Perc M (2012) Win-stay-lose-learn promotes cooperation in the spatial prisoner's dilemma game. *PloS one* 7: e30689.
- Fu F, Nowak M, Hauert C (2010) Invasion and expansion of cooperators in lattice populations: Prisoner's dilemma vs. snowdrift games. *J Theor Biol* 266: 358–366.
- Roca C, Cuesta J, Sánchez A (2009) Effect of spatial structure on the evolution of cooperation. *Phys Rev E* 80: 046106.
- Roca C, Cuesta J, Sánchez A (2009) Evolutionary game theory: Temporal and spatial effects beyond replicator dynamics. *Phys Life Rev* 6: 208–249.
- Langer P, Nowak M, Hauert C (2008) Spatial invasion of cooperation. *J Theor Biol* 250: 634–641.
- Helbing D (1992) Interrelations between stochastic equations for systems with pair interactions. *Physica A* 181: 29–52.
- Taylor P, Jonker L (1978) Evolutionary stable strategies and game dynamics. *Math Biosci* 40: 145–156.
- Schuster P, Sigmund K (1983) Replicator dynamics. *J Theor Biol* 100: 533–538.

## Author Contributions

Conceived and designed the experiments: CM WC WL RG YJ. Performed the experiments: CM WC WL RG YJ. Analyzed the data: CM WC WL RG YJ. Contributed reagents/materials/analysis tools: CM WC WL RG YJ. Wrote the paper: CM.
